# Supplementary material for: Multiregional Radiomic Signatures Based on Functional Parametric Maps from DCE-MRI for Preoperative Identification of Estrogen Receptor and Progesterone Receptor Status in Breast Cancer
Source: MDPI journal article supplement (doi:10.3390/diagnostics12102558), 2022-10-21
Supplement: s1 [file s1]

**The inclusion criteria** were (i) confirmed diagnosis of BC via pathological assessment of biopsy specimens; (ii) underwent DCE-MRI less than 1 month before surgery; and (iii) the presence of mass-like and single tumor (facilitating the subsequent segmentation of breast tumors).

**The exclusion criteria** were (i) preoperative treatment, such as radiotherapy, chemotherapy, or chemoradiotherapy; (ii) incomplete pathology data (ER or PR status unknown); (iii) lack of DCE-MRI data; and (iv) insufficient MRI quality (e.g., motion artifacts).

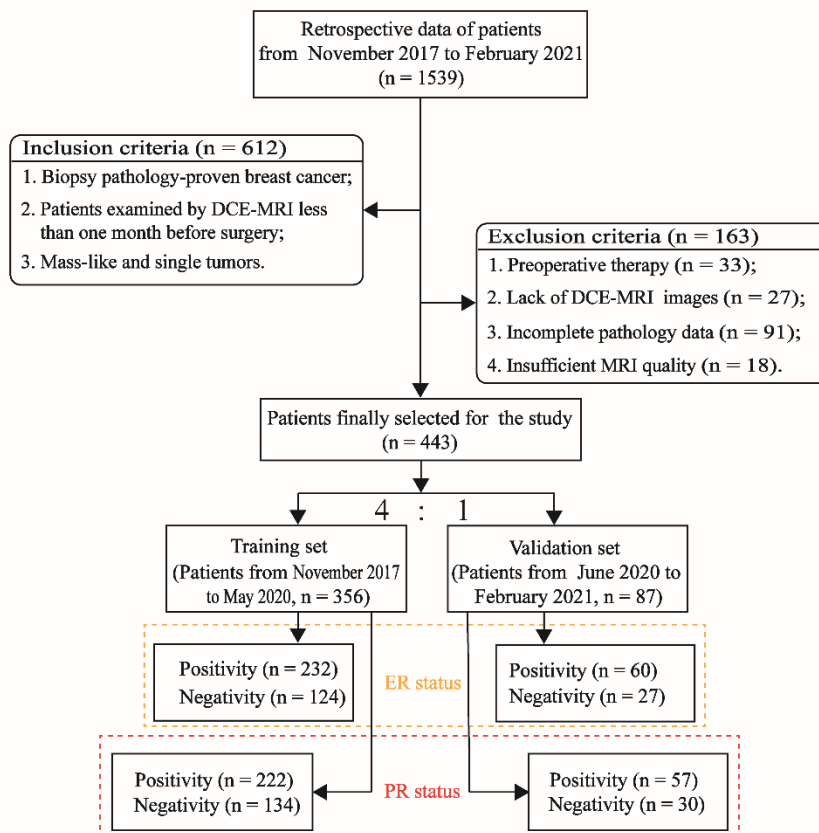

**Figure S1.** Recruitment pathway for patients selected in our study.

**The semi-automatic segmentation procedures** mainly involved the following steps.

First, an arbitrary shaped ROI was drawn around the lesion area. Second, the maximum between-cluster variance method was applied to the ROI voxels and the segmented image was converted into a binary image with the objective region as 1 and the background region as 0. Third, morphological erosion was applied to the obtained binary image and the size of the structural element was set at  $4 \times 4$ . Fourth, a post-eroded image was traversed to obtain the largest unique eight-connected region. Finally, morphological dilation of the unique region was performed and the target region was considered as the intratumoral ROI.

**Table S1.** List of Radiomic Features

| Category (quantity)             | Radiomic features                                                                                                                                                                                                                                                                                                                                                                                                                                                                                                                                   |
|---------------------------------|-----------------------------------------------------------------------------------------------------------------------------------------------------------------------------------------------------------------------------------------------------------------------------------------------------------------------------------------------------------------------------------------------------------------------------------------------------------------------------------------------------------------------------------------------------|
| First-order statistics<br>n = 5 | Mean, Median, SD, Skewness, Kurtosis.                                                                                                                                                                                                                                                                                                                                                                                                                                                                                                               |
| GLCM<br>n = 45 <sup>a</sup>     | Energy, Contrast, Correlation, Variance, Entropy, Homogeneity, Inverse difference moment, Information measures of correlation 1, Information measures of correlation 2.                                                                                                                                                                                                                                                                                                                                                                             |
| Laws<br>n = 125 <sup>a</sup>    | Response to 5-pixel $\times$ 5-pixel filter targeting the specific texture enhancement patterns in the X and Y directions. 25 descriptors derive from all combinations of five one - dimensional filters: level (L), edge (E), spot (S), wave (W), and ripple (R). L5 = [1 4 6 4 1], E5 = [-1 -2 0 2 1], S5 = [-1 0 2 0 -1], R5 = [1 -4 6 -4 1], and W5 = [-1 2 0 -2 -1]. The 25 filters were L5L5, L5E5, L5S5, L5W5, L5R5, E5L5, E5E5, E5S5, E5W5, E5R5, S5L5, S5E5, S5S5, S5W5, S5R5, W5L5, W5E5, W5S5, W5W5, W5R5, R5L5, R5E5, R5S5, R5W5, R5R5. |
| Gabor<br>n = 240 <sup>a</sup>   | Gabor wavelet is sensitive to image edge and has good spatial locality and directional selectivity, and can grasp the spatial frequency (scale) and local structure characteristics of multiple directions in the local area of the image. Each descriptor quantifies response to a given Gabor filter at a specific frequency ( $f = 0, 2, 4, 8, 16, 32$ ) and orientation ( $\theta = 0^\circ, 22.5^\circ, 45^\circ, 67.5^\circ, 90^\circ, 112.5^\circ, 135^\circ, 167.5^\circ$ ).                                                                |

<sup>a</sup> First order statistics (mean, median, SD, skewness, and kurtosis) for per descriptor were calculated.

Abbreviations: GLCM, gray level co-occurrence matrix features

**Table S2.** Radiomic features identified in each region to discriminate ER positivity and negativity on functional parametric maps from breast DCE-MRI.

| No.                            | Group | Descriptor                            | Statistic | Map                  | Location   | Coefficient in LR model |                 |
|--------------------------------|-------|---------------------------------------|-----------|----------------------|------------|-------------------------|-----------------|
| Intratumoral radiomic features |       |                                       |           |                      |            | Intra-rad-score         | Multi-rad-score |
| I1                             | Gabor | $f = 4, \theta = 22.5^\circ$          | Mean      | MSI                  | Intratumor | - 0.7236                | - 0.8257        |
| I2                             | Gabor | $f = 4, \theta = 135^\circ$           | Skewness  | MSI                  | Intratumor | - 0.3938                | - 0.4202        |
| I3                             | Gabor | $f = 64, \theta = 135^\circ$          | Skewness  | MSI                  | Intratumor | - 0.3158                | - 0.2919        |
| I4                             | GLCM  | Homogeneity                           | Mean      | SI <sub>slope</sub>  | Intratumor | 4.4488                  | 4.5558          |
| I5                             | GLCM  | Inverse difference moment             | Median    | E <sub>initial</sub> | Intratumor | 0.2883                  | 0.3851          |
| I6                             | Gabor | $f = 4, \theta = 0^\circ$             | Kurtosis  | E <sub>initial</sub> | Intratumor | - 0.2644                | \               |
| I7                             | Gabor | $f = 16, \theta = 22.5^\circ$         | Median    | E <sub>initial</sub> | Intratumor | - 0.3855                | - 0.3940        |
| I8                             | Gabor | $f = 4, \theta = 112.5^\circ$         | Median    | E <sub>initial</sub> | Intratumor | - 0.4357                | - 0.3056        |
| I9                             | Laws  | L5E5                                  | Median    | E <sub>initial</sub> | Intratumor | 0.5190                  | 0.3517          |
| I10                            | Laws  | E5L5                                  | Skewness  | E <sub>initial</sub> | Intratumor | 0.3956                  | 0.4911          |
| I11                            | Laws  | W5S5                                  | Median    | E <sub>initial</sub> | Intratumor | 0.3361                  | 0.3832          |
| I12                            | GLCM  | Homogeneity                           | Mean      | ESER                 | Intratumor | 0.9334                  | 1.3239          |
| I13                            | Gabor | $f = 16, \theta = 0^\circ$            | Median    | SEP                  | Intratumor | 0.7591                  | 0.7746          |
| Peritumoral radiomic features  |       |                                       |           |                      |            | Peri-rad-score          |                 |
| P1                             | Gabor | G8                                    | Skewness  | MSI                  | Peritumor  | - 0.2858                | -0.3468         |
| P2                             | GLCM  | Variance                              | Median    | SI <sub>slope</sub>  | Peritumor  | - 46.1874               | - 83.0095       |
| P3                             | GLCM  | Information measures of correlation 2 | Mean      | SI <sub>slope</sub>  | Peritumor  | - 0.3372                | 0.6554          |
| P4                             | GLCM  | Correlation                           | Kurtosis  | E <sub>initial</sub> | Peritumor  | 0.2310                  | \               |
| P5                             | Laws  | L5E5                                  | Skewness  | E <sub>initial</sub> | Peritumor  | - 0.3938                | - 0.3029        |
| P6                             | Gabor | G64                                   | Mean      | ESER                 | Peritumor  | - 0.2953                | \               |
| P7                             | Laws  | W5R5                                  | Kurtosis  | ESER                 | Peritumor  | - 0.21430               | - 0.3678        |

Abbreviations: GLCM, gray level co-occurrence matrix features; SD, standard deviation; LR, logistic regression.

Intra-rad-score, peri-rad-score, and multi-rad-score calculation formulas in identifying

ER status:

$$\begin{aligned} \text{Intra-rad-score} = & 1.3084 - 0.7236 \times I1 - 0.3938 \times I2 - 0.3158 \times I3 + 4.4488 \times I4 + \\ & 0.2883 \times I5 - 0.2644 \times I6 - 0.3855 \times I7 - 0.4357 \times I8 + 0.5190 \times I9 + 0.3956 \times I10 + \\ & 0.3361 \times I11 + 0.9334 \times I12 + 0.7591 \times I13 \end{aligned}$$

$$\text{Peri-rad-score} = -1.3874 - 0.2858 \times P1 - 46.1874 \times P2 - 0.3372 \times P3 + 0.231 \times P4 - 0.3938 \times P5 - 0.2953 \times P6 - 0.2143 \times P7$$

$$\begin{aligned} \text{Multi-rad-score} = & -2.5571 - 0.8257 \times I1 - 0.4202 \times I2 - 0.2919 \times I3 + 4.5558 \times I4 + \\ & 0.3851 \times I5 - 0.394 \times I7 - 0.3056 \times I8 + 0.3517 \times I9 + 0.4911 \times I10 + 0.3832 \times I11 + \\ & 1.3239 \times I12 + 0.7746 \times I13 - 0.3468 \times P1 - 83.0095 \times P2 + 0.6554 \times P3 - 0.3029 \times P5 \\ & - 0.3678 \times P7 \end{aligned}$$

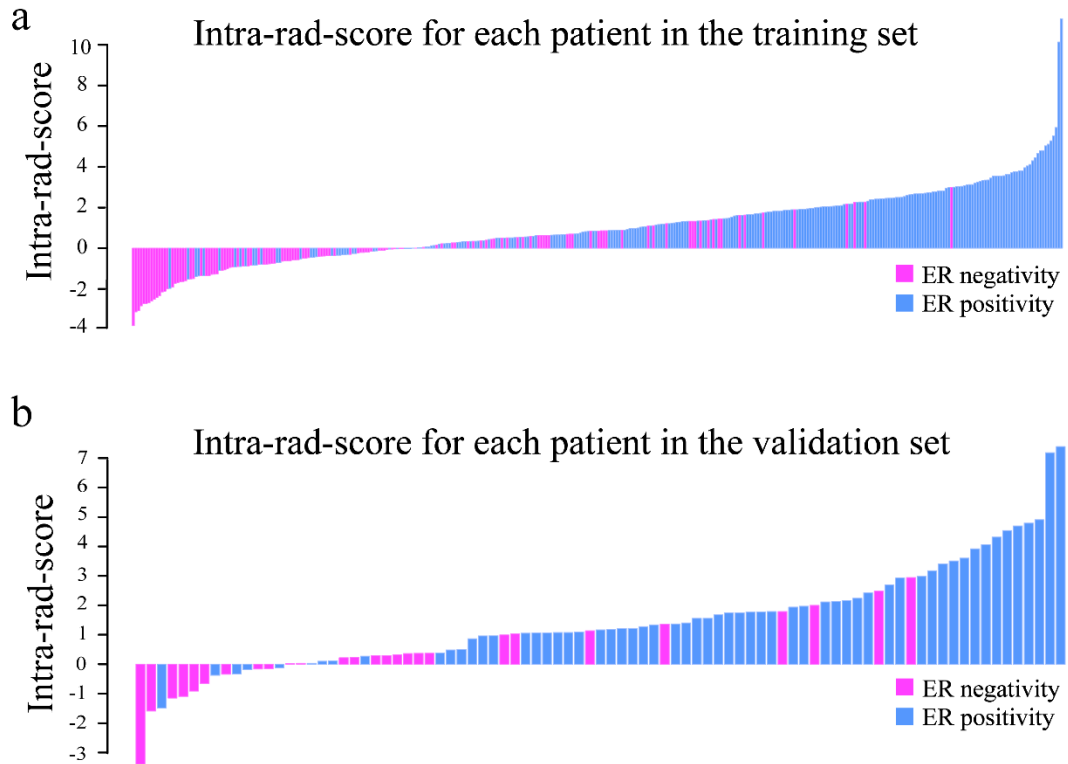

**Figure S2.** Intra-rad-score for every patient in each cohort. (a) Intra-rad-score for every patient in the training set; (b) Intra-rad-score for every patient in the validation set. The status of ER was marked with different colors.

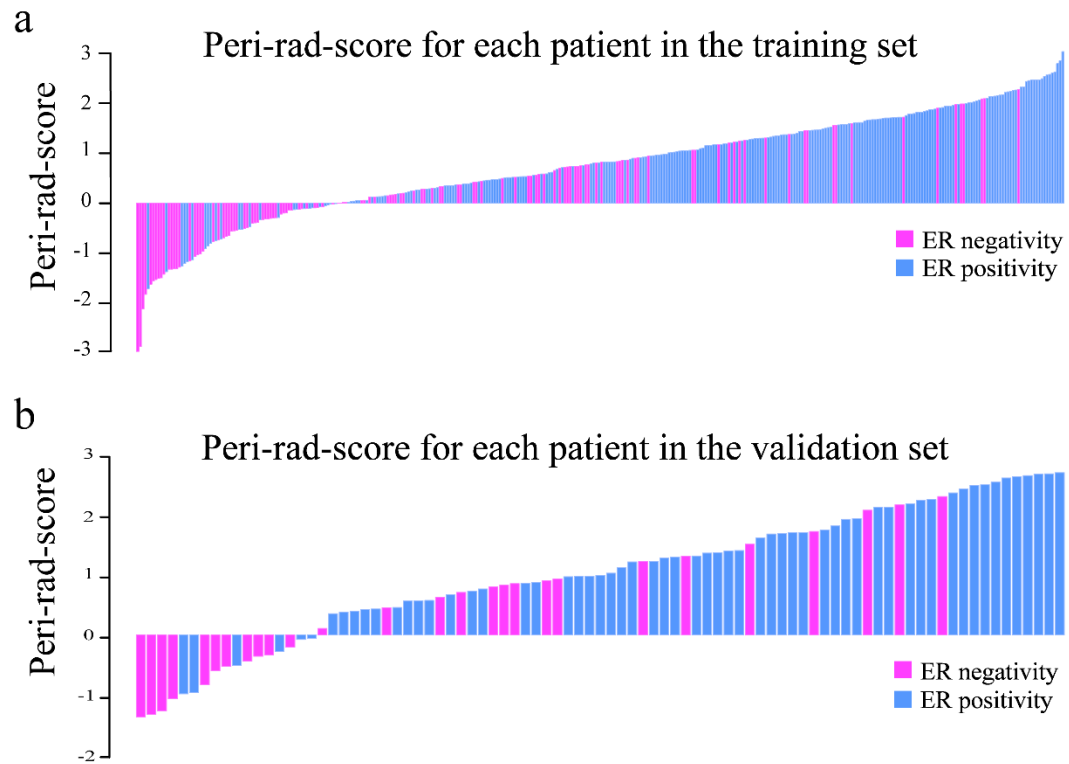

**Figure S3.** Peri-rad-score for every patient in each cohort. (a) Peri-rad-score for every patient in the training set; (b) Peri-rad-score for every patient in the validation set. The status of ER was marked with different colors.

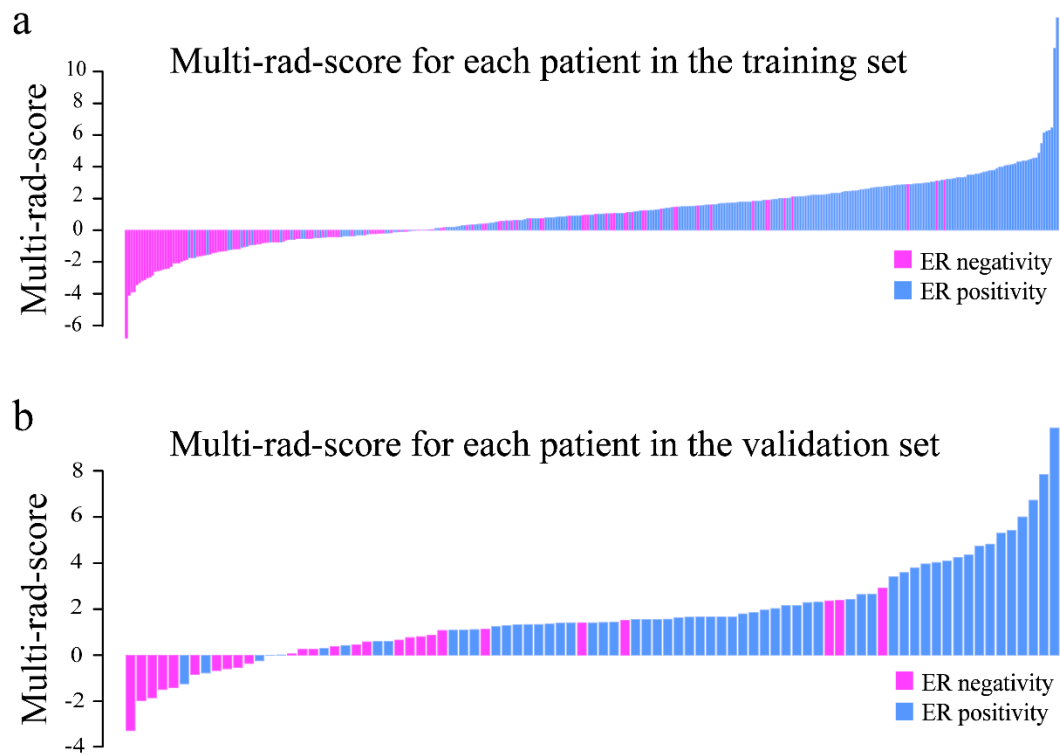

**Figure S4.** Multi-rad-score for every patient in each cohort. (a) Multi-rad-score for every patient in the training set; (b) Multi-rad-score for every patient in the validation set. The status of ER was marked with different colors.

**Table S3.** Radiomic features identified in each region to discriminate PR positivity and negativity on functional parametric maps from breast DCE-MRI.

| No.                            | Group | Descriptor                     | Statistic | Map                  | Location   | Coefficient in LR model |                 |
|--------------------------------|-------|--------------------------------|-----------|----------------------|------------|-------------------------|-----------------|
| Intratumoral radiomic features |       |                                |           |                      |            | Intra-rad-score         | Multi-rad-score |
| I1                             | Gabor | $f = 8, \theta = 22.5^\circ$   | Skewness  | MSI                  | Intratumor | - 0.3091                | \               |
| I2                             | Gabor | $f = 4, \theta = 135^\circ$    | Skewness  | MSI                  | Intratumor | - 0.4321                | - 0.3956        |
| I3                             | Laws  | L5E5                           | Skewness  | MSI                  | Intratumor | - 0.2763                | - 0.2232        |
| I4                             | Laws  | W5L5                           | Skewness  | MSI                  | Intratumor | 0.3164                  | 0.2783          |
| I5                             | GLCM  | Variance                       | Kurtosis  | SI <sub>slope</sub>  | Intratumor | - 0.5552                | \               |
| I6                             | GLCM  | Homogeneity                    | SD        | SI <sub>slope</sub>  | Intratumor | 0.4882                  | 0.7970          |
| I7                             | Gabor | $f = 64, \theta = 90^\circ$    | Skewness  | SI <sub>slope</sub>  | Intratumor | - 0.3118                | \               |
| I8                             | GLCM  | Inverse difference moment      | Median    | E <sub>initial</sub> | Intratumor | 0.5633                  | 0.5584          |
| I9                             | Gabor | $f = 16, \theta = 22.5^\circ$  | Median    | E <sub>initial</sub> | Intratumor | - 0.2972                | - 0.2780        |
| I10                            | Gabor | $f = 32, \theta = 67.5^\circ$  | SD        | E <sub>initial</sub> | Intratumor | 0.6487                  | 0.5464          |
| I11                            | Gabor | $f = 4, \theta = 112.5^\circ$  | Median    | E <sub>initial</sub> | Intratumor | - 0.3814                | - 0.4273        |
| I12                            | Laws  | E5L5                           | Skewness  | E <sub>initial</sub> | Intratumor | 0.3105                  | 0.4331          |
| I13                            | Gabor | $f = 32, \theta = 45^\circ$    | Mean      | ESER                 | Intratumor | - 0.3289                | - 0.4358        |
| I14                            | Gabor | $f = 64, \theta = 90^\circ$    | Mean      | ESER                 | Intratumor | - 0.5183                | - 0.5831        |
| I15                            | Gabor | $f = 64, \theta = 135^\circ$   | Skewness  | ESER                 | Intratumor | - 0.4025                | - 0.6090        |
| I16                            | Gabor | $f = 16, \theta = 0^\circ$     | Median    | SEP                  | Intratumor | 0.4850                  | 0.4453          |
| I17                            | Gabor | $f = 32, \theta = 112.5^\circ$ | Median    | SEP                  | Intratumor | 0.3602                  | 0.4752          |
| Peritumoral radiomic features  |       |                                |           |                      |            | Peri-rad-score          |                 |
| P1                             | GLCM  | Entropy                        | Mean      | MSI                  | Peritumor  | - 0.4363                | \               |
| P2                             | Laws  | S5E5                           | Skewness  | MSI                  | Peritumor  | - 0.2205                | \               |
| P3                             | GLCM  | Contrast                       | Median    | SI <sub>slope</sub>  | Peritumor  | - 0.3280                | \               |
| P4                             | Laws  | L5L5                           | Median    | SI <sub>slope</sub>  | Peritumor  | - 0.6271                | - 0.7345        |
| P5                             | GLCM  | Original                       | Skewness  | E <sub>initial</sub> | Peritumor  | 0.4465                  | 0.4750          |
| P6                             | Gabor | $f = 32, \theta = 112.5^\circ$ | Kurtosis  | E <sub>initial</sub> | Peritumor  | - 0.3651                | - 0.5293        |
| P7                             | Laws  | L5E5                           | Skewness  | E <sub>initial</sub> | Peritumor  | - 0.2608                | \               |
| P8                             | Gabor | $f = 8, \theta = 45^\circ$     | Kurtosis  | E <sub>peak</sub>    | Peritumor  | - 0.2771                | - 0.3845        |
| P9                             | Gabor | $f = 32, \theta = 67.5^\circ$  | Median    | E <sub>peak</sub>    | Peritumor  | 0.5859                  | 0.4265          |
| P10                            | Laws  | S5E5                           | Skewness  | E <sub>peak</sub>    | Peritumor  | 0.3427                  | 0.3142          |
| P11                            | Gabor | $f = 32, \theta = 45^\circ$    | Median    | ESER                 | Peritumor  | - 0.5521                | \               |
| P12                            | Gabor | $f = 64, \theta = 45^\circ$    | Mean      | ESER                 | Peritumor  | - 0.4427                | \               |
| P13                            | Gabor | $f = 4, \theta = 112.5^\circ$  | Median    | ESER                 | Peritumor  | 0.3804                  | \               |

Abbreviations: GLCM, gray level co-occurrence matrix features; SD, standard deviation; LR, logistic regression.

Intra-rad-score, peri-rad-score, and multi-rad-score calculation formulas in identifying

PR status:

$$\begin{aligned} \text{Intra-rad-score} = & 0.8409 - 0.3091 \times I1 - 0.4321 \times I2 - 0.2763 \times I3 + 0.3164 \times I4 - 0.5552 \\ & \times I5 + 0.4882 \times I6 - 0.3118 \times I7 + 0.5633 \times I8 - 0.2972 \times I9 + 0.6487 \times I10 - 0.3814 \times \\ & I11 + 0.3105 \times I12 - 0.3289 \times I13 - 0.5183 \times I14 - 0.4025 \times I15 + 0.4850 \times I16 + 0.3602 \\ & \times I17 \end{aligned}$$

$$\begin{aligned} \text{Peri-rad-score} = & 0.7584 - 0.4363 \times P1 - 0.2205 \times P2 - 0.328 \times P3 - 0.6271 \times P4 + 0.4465 \\ & \times P5 - 0.3651 \times P6 - 0.2608 \times P7 - 0.2771 \times P8 + 0.5859 \times P9 + 0.3427 \times P10 - 0.5521 \\ & \times P11 - 0.4427 \times P12 + 0.3804 \times P13 \end{aligned}$$

$$\begin{aligned} \text{Multi-rad-score} = & 0.9540 - 0.3956 \times I2 - 0.2232 \times I3 + 0.2783 \times I4 + 0.7970 \times I6 + \\ & 0.5584 \times I8 - 0.278 \times I9 + 0.5464 \times I10 - 0.4273 \times I11 + 0.4331 \times I12 - 0.4358 \times I13 - \\ & 0.5831 \times I14 - 0.609 \times I15 + 0.4453 \times I16 + 0.4752 \times I17 - 0.7345 \times P4 + 0.4750 \times P5 \\ & - 0.5293 \times P6 - 0.3845 \times P8 + 0.4265 \times P9 + 0.3142 \times P10 \end{aligned}$$



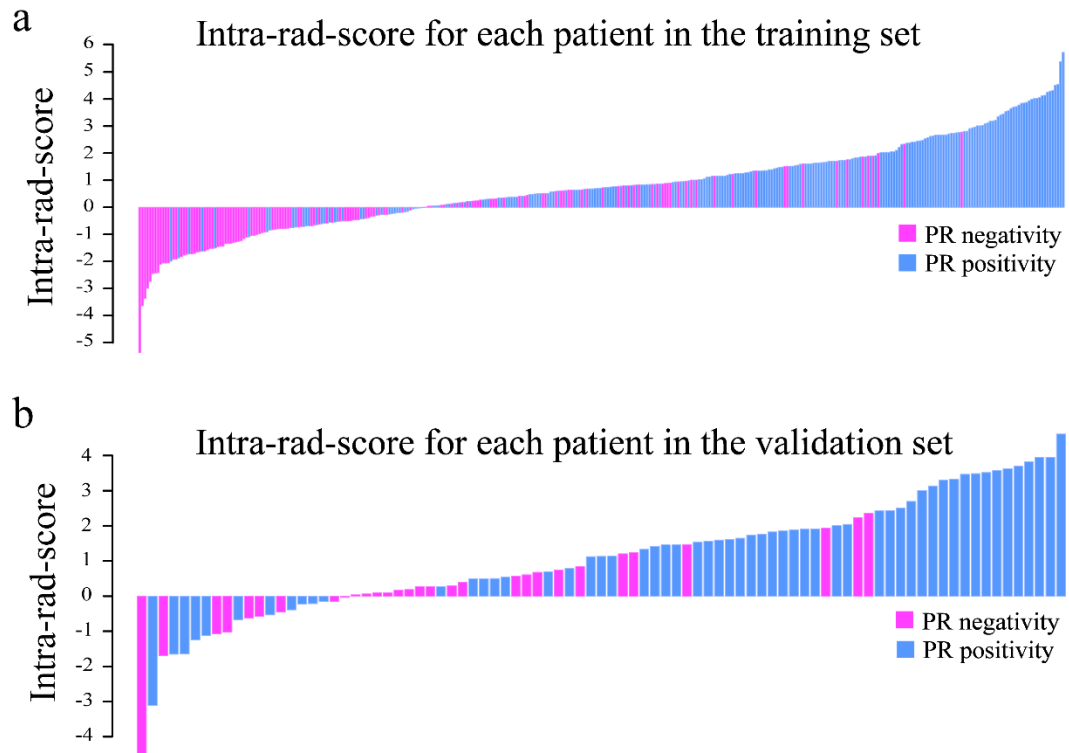

**Figure S5.** Intra-rad-score for every patient in each cohort. (a) Intra-rad-score for every patient in the training set; (b) Intra-rad-score for every patient in the validation set. The status of PR was marked with different colors.

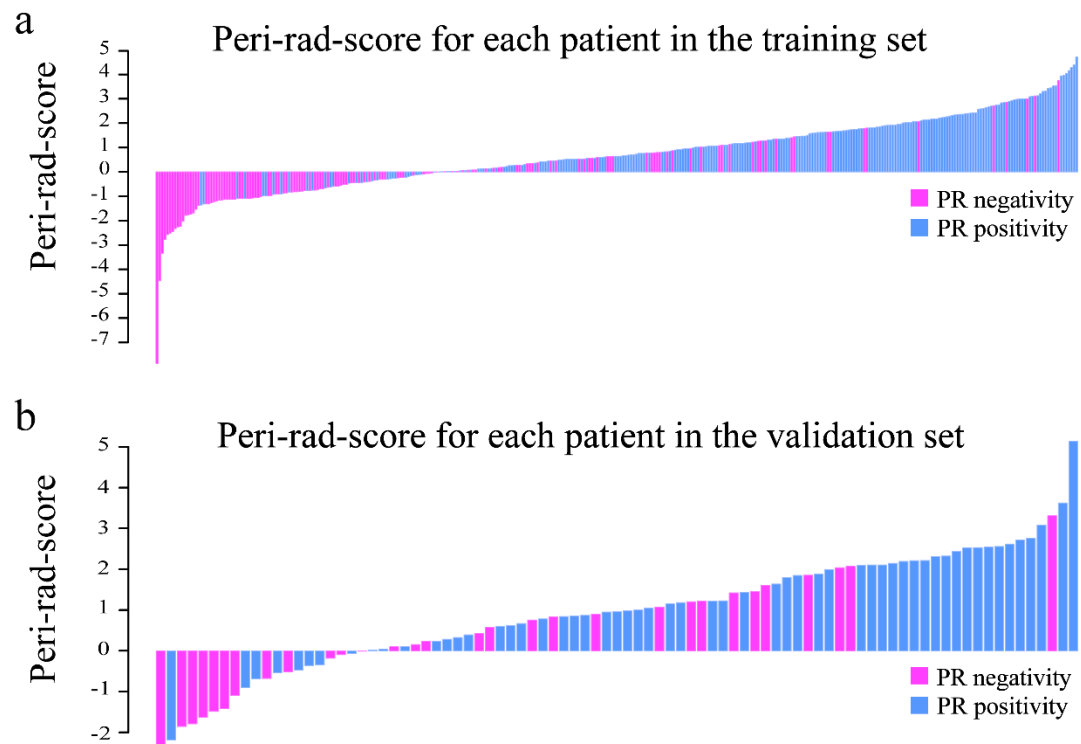

**Figure S6.** Peri-rad-score for every patient in each cohort. (a) Peri-rad-score for every patient in the training set; (b) Peri-rad-score for every patient in the validation set. The status of PR was marked with different colors.

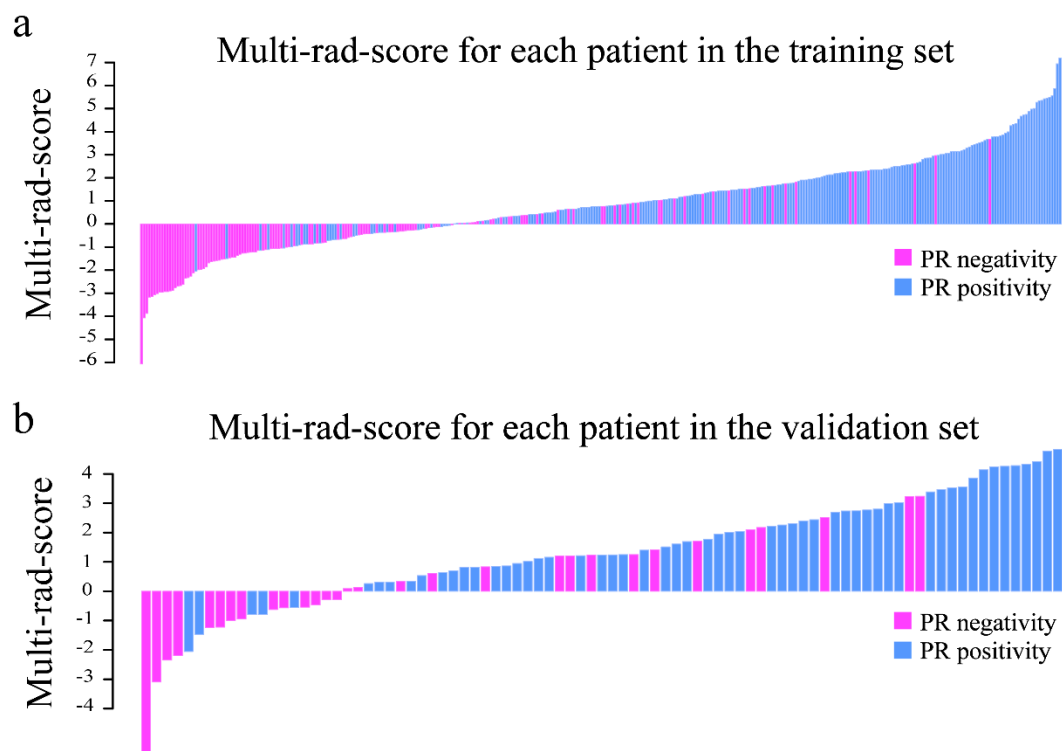

**Figure S7.** Multi-rad-score for every patient in each cohort. (a) Multi-rad-score for every patient in the training set; (b) Multi-rad-score for every patient in the validation set. The status of PR was marked with different colors.
